# Supplementary material
Source: PubMed Central journal article supplement (PMC7065506)
Supplement: NIHMS278273-supplement-1.pdf [file NIHMS278273-supplement-1.pdf]

**Appendix 1 – Mortality rates according to patient and hospital characteristics**

|                                                | <b>Patients</b><br>(N=4,498 ) | <b>Deaths</b><br>320 (7.1%) | <b>P value</b> |
|------------------------------------------------|-------------------------------|-----------------------------|----------------|
| <b>Patient characteristics</b>                 |                               |                             |                |
| Female                                         | 988                           | 73 (7.4%)                   | 0.698          |
| Age 65-69                                      | 1,627                         | 81 (5.0%)                   | <0.001         |
| Age 70-79                                      | 2,386                         | 173 (7.3%)                  |                |
| Age $\geq$ 80                                  | 485                           | 66 (13.6%)                  |                |
| Non-white                                      | 260                           | 23 (8.8%)                   | 0.267          |
| Non-elective admission                         | 472                           | 75 (15.9%)                  | <0.001         |
| Charlson score $\geq$ 3                        | 2,484                         | 171 (6.9%)                  | 0.500          |
| <b>Number of hospital beds</b>                 |                               |                             |                |
| $\leq$ 200 hospital beds                       | 458                           | 43 (9.4%)                   | 0.003          |
| 201-400 hospital beds                          | 1,125                         | 102 (9.1%)                  |                |
| 401-600 hospital beds                          | 1,208                         | 87 (7.2%)                   |                |
| > 600 hospital beds                            | 1,694                         | 86 (5.1%)                   |                |
| <b>Systems characteristics</b>                 |                               |                             |                |
| Cardiac ICU                                    | 3,378                         | 243 (7.2%)                  | 0.976          |
| Lung transplantation                           | 1,546                         | 68 (4.4%)                   | <0.001         |
| Kidney transplantation                         | 2,364                         | 121 (5.1%)                  | <0.001         |
| Bariatric surgery                              | 2,897                         | 189 (6.5%)                  | 0.060          |
| Complex medical oncology services <sup>±</sup> | 2,411                         | 112 (4.6%)                  | <0.001         |
| Cardiac catheterization                        | 3,743                         | 272 (7.3%)                  | 0.417          |
| PET scanner                                    | 2,904                         | 169 (5.8%)                  | <0.001         |
| High nurse ratio                               | 2,087                         | 97 (4.6%)                   | <0.001         |
| Teaching hospital                              | 2,808                         | 140 (5.0%)                  | <0.001         |

<sup>±</sup> indicated by the presence of a bone marrow transplant unit

ICU = intensive care unit; PET = positron emission tomography;

**Appendix 2a – Frequency of esophageal lesion location and disease type\***

|                                          | Upper esophagus | Mid esophagus | Lower esophagus | Other | Unspecified | Cardia | Carcinoma in situ | Barrett's |
|------------------------------------------|-----------------|---------------|-----------------|-------|-------------|--------|-------------------|-----------|
| Low-volume hospital, < 3 characteristics | 1.3             | 6.0           | 28.6            | 5.8   | 5.3         | 38.1   | 2.2               | 13.8      |
| Low-volume hospital, ≥3 characteristics  | 1.9             | 5.6           | 25.0            | 11.3  | 4.4         | 35.6   | 1.9               | 14.4      |
| Medium-volume hospital                   | 1.8             | 5.0           | 29.8            | 5.9   | 3.9         | 38.3   | 1.6               | 20.6      |
| High-volume hospital                     | 1.1             | 4.6           | 25.4            | 7.4   | 4.1         | 46.6   | 0.9               | 24.0      |

**Appendix 2b – Mortality rate according to esophageal lesion location and disease type \***

|                                          | Upper esophagus | Mid esophagus | Lower esophagus | Other | Unspecified | Cardia | Carcinoma in situ | Barrett's |
|------------------------------------------|-----------------|---------------|-----------------|-------|-------------|--------|-------------------|-----------|
| Low-volume hospital, < 3 characteristics | 5.9             | 9.2           | 11.8            | 20.3  | 10.5        | 10.7   | 7.1               | 5.1       |
| Low-volume hospital, ≥3 characteristics  | 0               | 0             | 7.5             | 5.6   | 14.3        | 8.8    | 0                 | 0         |
| Medium-volume hospital                   | 14.8            | 14.5          | 4.8             | 12.1  | 3.4         | 5.0    | 4.2               | 3.2       |
| High-volume hospital                     | 5.9             | 4.2           | 2.3             | 5.3   | 9.5         | 3.1    | 7.7               | 1.6       |

\*all numbers are percentages

**Appendix 3a – Frequency of esophagectomy type\***

|                                               | Total esophagectomy | Partial esophagectomy | Esophagectomy not otherwise specified | Intra-thoracic anastomosis |
|-----------------------------------------------|---------------------|-----------------------|---------------------------------------|----------------------------|
| Low-volume hospital, < 3 characteristics      | 23.2                | 71.8                  | 5.0                                   | 27.7                       |
| Low-volume hospital, $\geq 3$ characteristics | 23.8                | 66.3                  | 10.6                                  | 24.4                       |
| Medium-volume hospital                        | 28.4                | 66.8                  | 4.9                                   | 25.5                       |
| High-volume hospital                          | 28.5                | 69.4                  | 2.2                                   | 29.6                       |

**Appendix 3b – Mortality rate according to esophagectomy type\***

|                                               | Total esophagectomy | Partial esophagectomy | Esophagectomy not otherwise specified | Intra-thoracic anastomosis |
|-----------------------------------------------|---------------------|-----------------------|---------------------------------------|----------------------------|
| Low-volume hospital, < 3 characteristics      | 10.8                | 12.7                  | 18.8                                  | 11.6                       |
| Low-volume hospital, $\geq 3$ characteristics | 7.9                 | 7.6                   | 5.9                                   | 5.1                        |
| Medium-volume hospital                        | 6.7                 | 6.1                   | 8.0                                   | 4.9                        |
| High-volume hospital                          | 2.5                 | 3.4                   | 11.8                                  | 2.6                        |

\*all numbers are percentages
